# Supplementary figures and images for: Growth Hormone and the Human Hair Follicle
Source: MDPI journal article supplement (doi:10.3390/ijms222413205), 2021-12-08

**Chromosome**

**17q22**

**GH1**

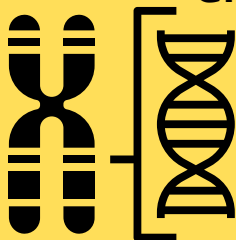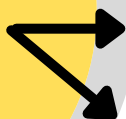

**20 kDa GH**

**22 kDa GH**

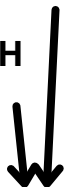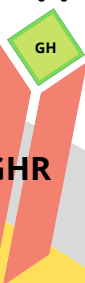

**SOCS**

**JAK2**

**STAT1**

**STAT3**

**STAT5**

**SFK**

**RAS**

**MEK**

**ERK1/2**

**MAPK**

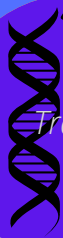

*Transcription*

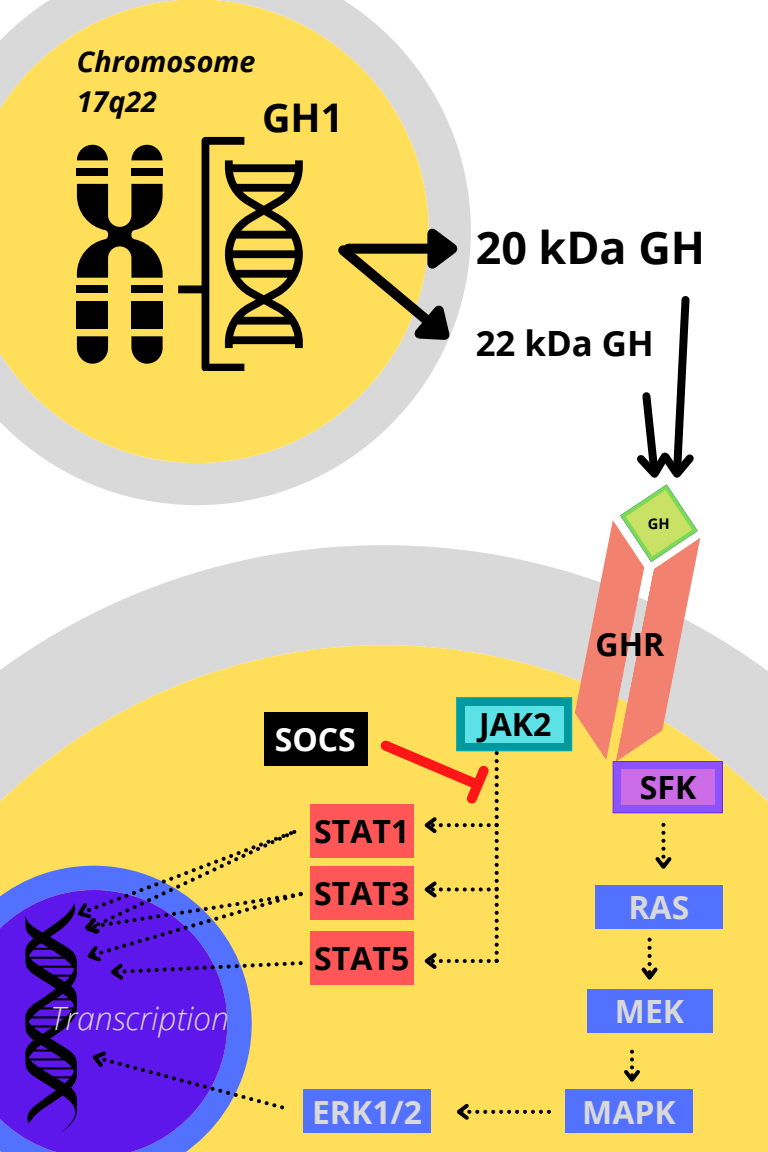

Supplement: s1 [file s1]
